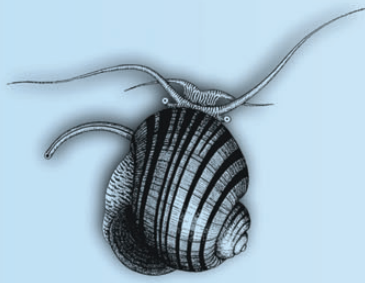

EVOLUTION OF SYMBIOSIS WITH *LINGULA* (BRACHIOPODA)  
IN THE BIVALVE SUPERFAMILY GALEOMMATOIDEA  
(HETERODONTA), WITH DESCRIPTION OF A  
NEW SPECIES OF *KOREAMYA*

RYUTARO GOTO<sup>1</sup>, HIROSHI ISHIKAWA<sup>2</sup>, YOICHI HAMAMURA<sup>3</sup>,  
SHIN'ICHI SATO<sup>4</sup> AND MAKOTO KATO<sup>5</sup>

<sup>1</sup>Department of Marine Ecosystem Dynamics, Atmosphere and Ocean Research Institute, The University of Tokyo, 5-1-5 Kashiwa-no-ha, Kashiwa, Chiba 277-8564, Japan;

<sup>2</sup>965-1 Kawachi-ko, Uwajima, Ehime 798-0075, Japan;

<sup>3</sup>14-16 Yaakeyama-Hibarigaoka-cho, Kure, Hiroshima 737-0901, Japan;

<sup>4</sup>The Tohoku University Museum, 6-3 Aoba, Aramaki, Aoba, Sendai 980-8578, Japan; and

<sup>5</sup>Graduate School of Human and Environmental Studies, Kyoto University, Yoshida-Nihonmatsu-cho, Sakyo, Kyoto 606-8501, Japan

Correspondence: R. Goto; e-mail: gotoryutaro@gmail.com

(Received 22 May 2013; accepted 28 December 2013)

ABSTRACT

Many members of the bivalve superfamily Galeommatoidea have symbiotic associations with other marine benthic invertebrates. Among them, *Koreamya arcuata* (A. Adams, 1856) is distinctive because it is the only known bivalve symbiotic with brachiopods. Here we describe *Koreamya setouchiensis* n. sp. as the second example in this genus, based on specimens collected in and around the Seto Inland Sea, Japan. Similar to *K. arcuata*, this bivalve species attaches to the anterior end of the shell valve of living *Lingula anatina* Lamarck, 1801 by means of byssal threads. However, shell morphologies of the two bivalve species are clearly different; *K. setouchiensis* has an ovate shell, while *K. arcuata* has an elongated-triangular shell. These morphological differences are probably due to the difference in posture on the hosts. To understand how symbiotic association with *Lingula* evolved in Galeommatoidea, we performed molecular phylogenetic analyses using three nuclear (18S, 28S and H3) and one mitochondrial (COI) genes. The two *Koreamya* species with remarkably differently shaped shells were monophyletic, suggesting that their symbiotic associations with *Lingula* have the same evolutionary origin. Furthermore, the *Koreamya* clade formed a monophyletic group with anemone-associated galeommatoideans (*Nipponomontacuta actinariophila* and *Montacutona* sp.). This result and their morphological similarities suggest the possibility of host switching between sea anemones and *Lingula*.

INTRODUCTION

Galeommatoidea are a superfamily of tiny marine bivalves that have diversified greatly in shallow waters (Coan, Valentich Scott & Bernard, 2000; Bouchet *et al.*, 2002; Paulay, 2003; Coan & Valentich Scott, 2012). Interestingly, many members of this bivalve group have symbiotic (mostly commensal) associations with marine benthic invertebrates (Boss, 1965; Morton & Scott, 1989). Symbiotic galeommatoideans usually live on the host's body or inside the host's burrow (Morton, 1988; Morton & Scott, 1989) and are considered to use these sites as a shelter from predators and to benefit from the water currents created by the hosts, which are rich in oxygen and organic particles (Morton, 1988; Morton & Scott, 1989; Goto, Hamamura & Kato, 2007). Except for a few exceptions (Ockelmann & Muus, 1978; Li & Ó Foighil, 2012), most symbiotic galeommatoideans

use one to several closely related species as hosts (Sato *et al.*, 2011), indicating that their host specificity is relatively high. In contrast, the host spectrum of galeommatoideans as a whole is surprisingly broad, including the phyla Arthropoda, Annelida, Echinodermata, Mollusca and Brachiopoda (Boss, 1965; Morton & Scott, 1989). Recent molecular phylogenetic study has shown that host switching among various host taxa has played a key role in diversification of this bivalve group (Goto *et al.*, 2012). However, our knowledge of the evolutionary history of their host associations remains limited.

Among symbiotic galeommatoideans, *Koreamya arcuata* (Adams, 1856) is distinctive, because it is the only bivalve known to have a symbiotic association with brachiopods (Fernando & Fernando, 1983; Savazzi, 1991, 2001; Lützen, Hong & Yamashita, 2009; Sato *et al.*, 2011). This bivalve lives attached by byssal threads to the shell valve of *Lingula*

(Lingulidae, Brachiopoda) (Savazzi, 2001; Lützen, Hong & Yamashita, 2009). *Lingula* are filter feeders with two shell valves and an elongated pedicle, and construct vertical burrows in shallow-water soft sediments (Emig, 2000). Various ectosymbionts of *Lingula* have been reported, but most are facultative symbionts (Hammond, 1984). In contrast, *K. arcuata* is an obligate symbiont (Savazzi, 2001; Lützen, Hong & Yamashita, 2009). It is an intriguing question as to how such a tight association with *Lingula* evolved in *Koreamya*.

A recent study suggested that *K. arcuata* is morphologically similar to *Montacutona* species, which are associated with sea anemones (Lützen, Hong & Yamashita, 2009). They share several morphological characteristics, such as a lithodesma in the hinge, a highly reduced outer demibranch and a particular type of sperm receptacle (Lützen, Hong & Yamashita, 2009). If *Koreamya* and *Montacutona* are truly closely related, host switching may have occurred between *Lingula* and sea anemones. On the other hand, *K. arcuata* was previously considered to be identical to the galeommatoidean *Curvemysella paula* (Adams, 1856) (Morton & Scott, 1989), which has a symbiotic association with hermit crabs (Morton & Scott 1989; Goto *et al.*, 2007). This is probably because both bivalve species have crescent-shaped or elongated-triangular shells, which are apparently similar, although the two species clearly differ in their dentition and anatomical characteristics (Lützen, Hong & Yamashita, 2009).

In this study, we aim to understand how symbiotic association with *Lingula* evolved in Galeommatoidea, and report molecular phylogenetic analyses using two nuclear ribosomal genes (18S and 28S rRNA), one nuclear protein gene (histone H3) and one mitochondrial protein gene (cytochrome *c* oxidase subunit I, COI) of diverse galeommatoideans, including two *Koreamya* species, and eight outgroup species. In addition, we describe a new species of *Koreamya* based on the specimens collected in and around the Seto Inland Sea, Japan. Finally, we discuss the morphological and ecological adaptations of *Koreamya* to symbiotic association with *Lingula*.

## MATERIAL AND METHODS

### Sample and sequence data collection

We collected four specimens of tiny galeommatoidean bivalves attached to the shells of *Lingula anatina* Lamarck, 1801 in the muddy sand flats in and around the Seto Inland Sea, Japan, between 2009 and 2012 (Figs 1, 2A). Three of the bivalve specimens were stored in 100% ethanol and the other was stored in 70% ethanol after being fixed in 10% formaldehyde. Two of the three specimens stored in 100% ethanol were used for the molecular phylogenetic analyses (Tables 1, 2). In addition, total genomic DNA samples of four specimens of *Koreamya arcuata* extracted by Sato *et al.* (2011) were used for the molecular phylogenetic analyses (Tables 1, 2); two specimens were collected from *L. anatina* in Seondo-ri, Biin-myeon, Seocheon-gun, Chungcheongnam-do, South Korea (Figs 1, 2B; Table 1), while the other two specimens were collected from *L. adamsi* Dall, 1873 in Woldoo, Yongjeong-ri, Hyeongyeong-myeon, Muan-gun, Jeollanam-do, South Korea (Fig. 1; Table 1) (Sato *et al.*, 2011). Although the shell morphology of *K. arcuata* differs slightly between the two groups found on different *Lingula* species, the molecular analyses based on COI and ITS1 genes suggested that there is no genetic evidence to separate them (Sato *et al.*, 2011). We used sequence data of galeommatoideans and outgroups from GenBank to reconstruct the molecular phylogeny (Table 2).

### Molecular methods

Total genomic DNA was isolated from the bivalves following a previously described method (Goto *et al.*, 2012). A small piece of soft tissue was homogenized in 800  $\mu$ l of lysis buffer and incubated at 55°C overnight, after which 80  $\mu$ l of saturated potassium chloride was added to the lysate. This solution was incubated for 5 min on ice and then centrifuged for 10 min. The

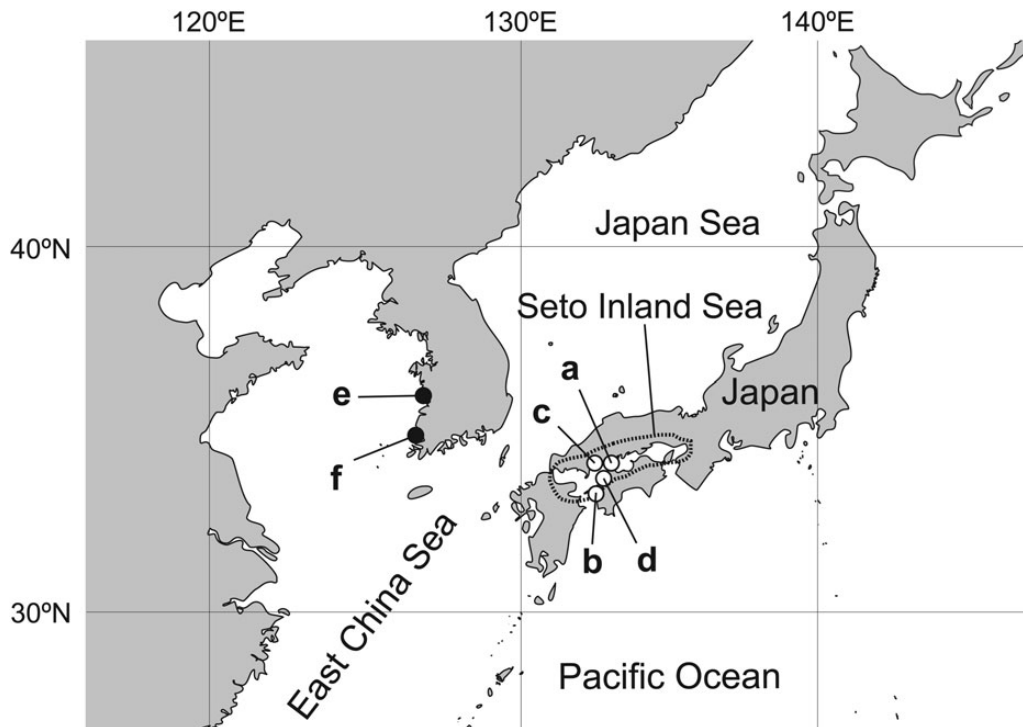

**Figure 1.** Sampling locations of *Koreamya setouchiensis* n. sp. (a–d) and *K. arcuata* (e, f). Japan: a, Hakatajima Island (type locality of *K. setouchiensis*); b, Maajiro; c, Niigata; d, Gogoshima Island. South Korea: e, Seondo-ri; f, Yongjeong-ri.

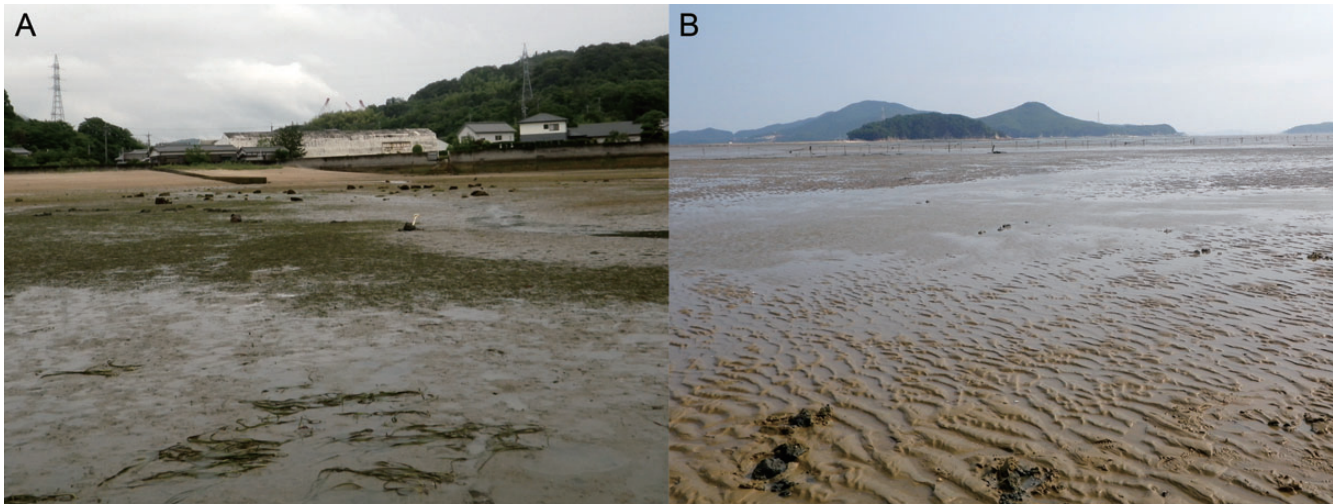

**Figure 2.** Habitat of *Koreameya setouchiensis* n. sp. and *K. arcuata*. **A.** Muddy sand flat at Hakatajima Island, Seto Inland Sea, Japan, type locality of *K. setouchiensis*. **B.** Mud flat at Seondo-ri, Biin-myeon, Seocheon-gun, Chungcheongnam-do, South Korea, sampling location of *K. arcuata*. (Photographs: **A.**, R. Goto; **B.**, S. Sato.)

**Table 1.** Sampling information of specimens from which sequences were newly obtained in this study.

| Species                        | Code           | Locality                             | Host                   |
|--------------------------------|----------------|--------------------------------------|------------------------|
| <i>Koreameya setouchiensis</i> | NSMT-Mo 78585  | Maajiro, Yawatahama, Ehime, Japan    | <i>Lingula anatina</i> |
| <i>Koreameya setouchiensis</i> | NSMT-Mo 78587  | Gogoshima, Matsuyama, Ehime, Japan   | <i>Lingula anatina</i> |
| <i>Koreameya arcuata</i>       | TUMC-1190962-1 | Seondo-ri, Seocheon-gun, South Korea | <i>Lingula anatina</i> |
| <i>Koreameya arcuata</i>       | TUMC-1190962-2 | Seondo-ri, Seocheon-gun, South Korea | <i>Lingula anatina</i> |
| <i>Koreameya arcuata</i>       | TUMC-1190969-1 | Yongjeong-ri, Muan-gun, South Korea  | <i>Lingula adamsi</i>  |
| <i>Koreameya arcuata</i>       | TUMC-1190969-2 | Yongjeong-ri, Muan-gun, South Korea  | <i>Lingula adamsi</i>  |

supernatant (700  $\mu$ l) was transferred to a new tube, cleaned once with a phenol/chloroform solution, and precipitated with an equal volume of 2-propanol. The DNA pellet was rinsed with 70% ethanol, vacuum-dried and dissolved in 100  $\mu$ l TE buffer.

We sequenced fragments of the 18S, 28S, H3 and COI genes. Polymerase chain reactions (PCRs) were used to amplify ~1700 bp of 18S, ~1000 bp of 28S, ~350 bp of H3 and ~700 bp of COI. Amplifications were performed in 20- $\mu$ l mixtures consisting of 0.4  $\mu$ l of forward and reverse primers (20  $\mu$ M each; primer sequences are provided in Table 3), 2.0  $\mu$ l of ExTaq buffer, 1.6  $\mu$ l of dNTPs (2.5  $\mu$ M each), 0.1  $\mu$ l of ExTaq polymerase (TaKaRa, Otsu, Japan) and 15.1  $\mu$ l of distilled water. Thermal cycling was performed with an initial denaturation for 3 min at 94°C, followed by 30 cycles of 30 s at 94°C, 30 s at a gene-specific annealing temperature (Table 3) and 2 min at 72°C, with a final 3 min extension at 72°C. The sequencing reaction was performed using PCR primers and internal primers (Table 3) and a BigDye Terminator Cycle Sequencing Ready Reaction Kit (Applied Biosystems, Foster City, CA) and electrophoresed on an ABI 3130 sequencer (Applied Biosystems). The obtained sequences were deposited in the DDBJ/EMBL/GenBank databases with accession numbers AB907557–AB907575 (Table 2).

#### Phylogenetic analysis

Sequences of the 18S and 28S genes were aligned using the Muscle program (Edgar, 2004) with default settings in the software Seaview (Galtier, Gouy & Gaultier, 1996; Gouy, Guindon

& Gascuel, 2010), while those of the H3 and COI genes were aligned without gaps. We employed Gblocks v. 0.91b (Castresana, 2000; Talavera & Castresana, 2007) to eliminate the ambiguously aligned regions in 18S and 28S alignments. Size of each gene prior and subsequent to treatment with Gblocks v. 0.91b is given in Table 4. Excluding ambiguous regions, the 18S, 28S, H3 and COI alignments contained 431, 245, 110 and 243 variable sites, respectively. Phylogenetic trees were constructed using the Bayesian and maximum likelihood (ML) methods. Bayesian analyses were performed using MrBayes v. 3.1.2 (Ronquist & Huelsenbeck, 2003) with substitution models chosen by Kakusan 4 (Tanabe, 2011). In the combined dataset, substitution parameters were estimated separately for each gene partition (Table 5). Two independent runs of Metropolis-coupled Markov chain Monte Carlo were carried out simultaneously, sampling trees every 100 generations and calculating the average standard deviation of split frequencies (ASDSFs) every 1,000 generations. Using the ‘stoprule’ option, analyses were continued until ASDSF dropped below 0.01, at which point the two chains were considered to have achieved convergence. As ASDSF was calculated based on the last 75% of the samples, we discarded the initial 25% of the sampled trees as burn-in. We confirmed that analyses reached stationarity well before the burn-in period by plotting the ln-likelihood of the sampled trees against generation time. For the ML analysis, model selection and tree search were conducted using the TreeFinder program (Jobb, Haeseler & Strimmer, 2004; Jobb, 2007). The robustness of the ML tree was evaluated by bootstrap analysis with 1,000 replications using the same program.

**Table 2.** GenBank accession numbers of the specimens used in this study.

| Superfamily    | Family                          | Species                                    | 18S rRNA                   | 28S rRNA                        | H3        | COI       |          |          |
|----------------|---------------------------------|--------------------------------------------|----------------------------|---------------------------------|-----------|-----------|----------|----------|
| Galeommatoidea | Galeommatidae                   | <i>Divariscintilla toyohiwakensis</i>      | AB714745                   | AB714788                        | AB714831  | AB714869  |          |          |
|                |                                 | <i>Ephippodonta gigas</i>                  | AB714746                   | AB714789                        | AB714832  | AB714870  |          |          |
|                |                                 | <i>Galeomma</i> sp.                        | AB714747                   | AB714790                        | AB714833  | AB714871  |          |          |
|                |                                 | <i>Pseudogaleomma</i> sp.                  | AB714748                   | AB714791                        | AB714834  | AB714872  |          |          |
|                |                                 | <i>Scintilla rosea</i>                     | AB714749                   | AB714792                        | –         | AB714873  |          |          |
|                |                                 | <i>Scintilla</i> aff. <i>hydatina</i>      | AB714750                   | AB714793                        | AB714835  | AB714874  |          |          |
|                |                                 | <i>Scintilla</i> sp.1                      | AB714751                   | AB714794                        | AB714836  | AB714875  |          |          |
|                |                                 | <i>Scintilla</i> sp.2                      | AB714752                   | AB714795                        | AB714837  | AB714876  |          |          |
|                | Lasaeidae                       | <i>Anisodevonia ohshimai</i>               | AB714754                   | AB714797                        | AB714838  | AB714878  |          |          |
|                |                                 | <i>Arthritica japonica</i>                 | AB714755                   | AB714798                        | AB714839  | AB714879  |          |          |
|                |                                 | <i>Brachiomya stigmatica</i>               | AB714753                   | AB714796                        | –         | AB714877  |          |          |
|                |                                 | <i>Byssobornia yamakawai</i>               | AB714756                   | AB714799                        | AB714840  | AB714880  |          |          |
|                |                                 | <i>Curvemysella paula</i>                  | AB714757                   | AB714800                        | AB714841  | AB714881  |          |          |
|                |                                 | <i>Devonia semperi</i>                     | AB714758                   | AB714801                        | AB714842  | AB714882  |          |          |
|                |                                 | <i>Entovalva lessonothuriae</i>            | AB714759                   | AB714802                        | AB714843  | AB714883  |          |          |
|                |                                 | <i>Kellia porculus</i>                     | AB714760                   | AB714803                        | AB714844  | AB714884  |          |          |
|                |                                 | <i>Koreamya arcuata</i> TUMC-1190962-1     | AB907557*                  | AB907563*                       | AB907569* | AB474955  |          |          |
|                |                                 | <i>Koreamya arcuata</i> TUMC-1190962-2     | AB907558*                  | AB907564*                       | AB907570* | AB474956  |          |          |
|                |                                 | <i>Koreamya arcuata</i> TUMC-1190969-1     | AB907559*                  | AB907565*                       | AB907571* | AB474950  |          |          |
|                |                                 | <i>Koreamya arcuata</i> TUMC-1190969-2     | AB907560*                  | AB907566*                       | AB907572* | AB474951  |          |          |
|                |                                 | <i>Koeamya setouchiensis</i> NSMT-Mo 78585 | AB907561*                  | AB907567*                       | –         | AB907573* |          |          |
|                |                                 | <i>Koeamya setouchiensis</i> NSMT-Mo 78587 | AB907562*                  | AB907568*                       | AB907573* | AB907574* |          |          |
|                |                                 | <i>Kurtiella</i> aff. <i>bidentata</i>     | AB714765                   | AB714808                        | –         | AB714889  |          |          |
|                |                                 | <i>Lasaea undulata</i>                     | AB714761                   | AB714804                        | AB714845  | AB714885  |          |          |
|                |                                 | <i>Litigiella pacifica</i>                 | AB714762                   | AB714805                        | AB714846  | AB714886  |          |          |
|                |                                 | <i>Melliteryx puncticulata</i>             | AB714763                   | AB714806                        | AB714847  | AB714887  |          |          |
|                |                                 | <i>Montacutona</i> sp.                     | AB714764                   | AB714807                        | AB714848  | AB714888  |          |          |
|                |                                 | <i>Mysella vitrea</i>                      | AM774519                   | AM779693                        | –         | –         |          |          |
|                |                                 | <i>Neaeromya rugifera</i>                  | AB714766                   | AB714809                        | AB714849  | AB714890  |          |          |
|                |                                 | <i>Nipponomontacuta actinariophila</i>     | AB714767                   | AB714810                        | AB714850  | AB714891  |          |          |
|                |                                 | <i>Nipponomysella oblongata</i>            | AB714768                   | AB714811                        | AB714851  | AB714892  |          |          |
|                |                                 | <i>Nipponomysella subtruncata</i>          | AB714769                   | AB714812                        | AB714852  | AB714893  |          |          |
|                |                                 | <i>Paraborniola matsumotoi</i>             | AB714770                   | AB714813                        | AB714853  | AB714894  |          |          |
|                |                                 | <i>Peregrinamor gastrochaenans</i>         | AB714771                   | AB714814                        | –         | AB714895  |          |          |
|                |                                 | <i>Peregrinamor ohshimai</i>               | AB714772                   | AB714815                        | AB714854  | AB714896  |          |          |
|                |                                 | <i>Pseudopythina ochetostomae</i>          | AB714773                   | AB714816                        | AB714855  | –         |          |          |
|                |                                 | <i>Pseudopythina subsinuata</i>            | AB714774                   | AB714817                        | AB714856  | AB714897  |          |          |
|                |                                 | <i>Pseudopythina macrophthalmensis</i>     | AB714775                   | AB714818                        | AB714857  | AB714898  |          |          |
|                |                                 | <i>Pseudopythina</i> aff. <i>ariake</i>    | AB714776                   | AB714819                        | AB714858  | AB714899  |          |          |
|                |                                 | <i>Pseudopythina</i> aff. <i>nodosa</i>    | AB714777                   | AB714820                        | AB714859  | AB714900  |          |          |
|                |                                 | <i>Pythina deshayesiana</i>                | AB714778                   | AB714821                        | –         | –         |          |          |
|                |                                 | <i>Salpocola philippinensis</i>            | AB714779                   | AB714822                        | AB714860  | AB714901  |          |          |
|                |                                 | Basterotiidae                              | <i>Basterotia carinata</i> | AB714780                        | AB714823  | AB714861  | AB714902 |          |
|                |                                 |                                            | <i>Basterotia gouldi</i>   | AB714781                        | AB714824  | AB714862  | AB714903 |          |
|                |                                 |                                            | <i>Basterotia</i> sp.      | AB714782                        | AB714825  | AB714863  | AB714904 |          |
|                |                                 | Outgroups                                  | Splecurtidae               | <i>Azorinus minutus</i>         | AB714783  | AB714826  | AB714864 | AB714905 |
|                |                                 |                                            | Gastrochaenidae            | <i>Gastrochaena cuneiformis</i> | AB714784  | AB714827  | AB714865 | –        |
| Veneridae      | <i>Irus mitis</i>               |                                            | AB714785                   | AB714828                        | AB714866  | AB714906  |          |          |
| Mactridae      | <i>Meropesta nicobarica</i>     |                                            | AB714786                   | AB714829                        | AB714867  | –         |          |          |
| Solenidae      | <i>Solen strictus</i>           |                                            | AB714787                   | AB714830                        | AB714868  | AB714907  |          |          |
| Solemyidae     | <i>Solemya velum</i>            |                                            | AF120524                   | AY145421                        | AY070146  | U56852    |          |          |
| Nuculanidae    | <i>Nuculana pella</i>           |                                            | AY070111                   | AJ307553                        | AY070148  | AY070138  |          |          |
| Trigoniidae    | <i>Neotrigonia margaritacea</i> |                                            | AF411690                   | DQ279963                        | AY070155  | U56850    |          |          |

\*New sequences obtained for this study.

**Table 3.** Information on primers and PCR conditions used in this study.

| Primer                           | Direction | Sequence 5'–3'                    | PCR condition                                                  | References                 |
|----------------------------------|-----------|-----------------------------------|----------------------------------------------------------------|----------------------------|
| <b>18SrRNA</b>                   |           |                                   |                                                                |                            |
| PCR amplification and sequencing |           |                                   | 94°C 4 min (94°C 30 s, 55°C 30 s, 72°C 2 min) × 35, 72°C 5 min |                            |
| G01                              | Forward   | CACCT GGTTG ATCCT GCCAG           |                                                                | Saunders & Kraft (1994)    |
| G07                              | Reverse   | AGCTT GATCC TTCTG CAGGT TCACC TAC |                                                                | Saunders & Kraft (1994)    |
| Sequencing                       |           |                                   |                                                                |                            |
| G03                              | Forward   | GTCTG GTGCC AGCAG CCGCG G         |                                                                | Saunders & Kraft (1994)    |
| 1155F                            | Forward   | CTGAA ACTTA AAGGA ATTGA CGG       |                                                                | Wollscheid & Wägele (1999) |
| 18d                              | Forward   | CACAC CGCCC GTCGC TACTA CCGAT TG  |                                                                | Hillis & Dixon (1991)      |
| 18Sop                            | Reverse   | GCTCC CTCTC CGGAA TCGAA CCC       |                                                                | Hoso et al. (2010)         |
| G08                              | Reverse   | GAACG GCCAT GCACC ACCAC C         |                                                                | Saunders & Kraft (1994)    |
| <b>28SrRNA</b>                   |           |                                   |                                                                |                            |
| PCR amplification and sequencing |           |                                   | 94°C 4 min (94°C 30 s, 52°C 30 s, 72°C 2 min) × 40, 72°C 5 min |                            |
| D1                               | Forward   | ACCCS CTGAA YTAA GCAT             |                                                                | Colgan et al. (2003)       |
| D3                               | Reverse   | GACGA TCGAT TTGCA CGTCA           |                                                                | Vonnemann et al. (2005)    |
| Sequencing                       |           |                                   |                                                                |                            |
| D2F                              | Forward   | CCCGT CTTGA AACAC GGACC AAGG      |                                                                | Vonnemann et al. (2005)    |
| C2R                              | Reverse   | ACTCT CTCTT CAAAG TTCTT TTC       |                                                                | Dayrat et al. (2001)       |
| <b>H3</b>                        |           |                                   |                                                                |                            |
| PCR amplification and sequencing |           |                                   | 94°C 4 min (94°C 30 s, 52°C 30 s, 72°C 2 min) × 40, 72°C 5 min |                            |
| H3F                              | Forward   | ATGGCTCGTACCAAGCAGACVGC           |                                                                | Colgan et al. (1998)       |
| H3R                              | Reverse   | ATATCCTTRGGCATTRATRGTCAC          |                                                                | Colgan et al. (1998)       |
| <b>COI</b>                       |           |                                   |                                                                |                            |
| PCR amplification and sequencing |           |                                   | 94°C 4 min (94°C 30 s, 50°C 30 s, 72°C 2 min) × 40, 72°C 5 min |                            |
| LCO1490                          | Forward   | GGT CAA CAA TCA TAA AGA TAT TGG   |                                                                | Folmer et al. (1994)       |
| HCO2198                          | Reverse   | TAA ACT TCA GGG TGA CCA AAA AAT C |                                                                | Folmer et al. (1994)       |

**Table 4.** Size of each gene fragment before and after treatment with Gblocks v. 0.91b.

| Gene     | Original length of alignment (bp) | Final length of alignment (bp) |
|----------|-----------------------------------|--------------------------------|
| 18S rRNA | 2030                              | 1720                           |
| 28S rRNA | 1425                              | 912                            |
| H3       | 328                               | 328                            |
| COI      | 659                               | 659                            |

**Table 5.** Information on models of sequence evolution for Bayesian and maximum likelihood (ML) analyses.

| Gene     | Substitution model (Bayesian) | Substitution model (ML) |
|----------|-------------------------------|-------------------------|
| 18S rRNA | K80 + Gamma                   | GTR + GI                |
| 28S rRNA | GTR + Gamma                   | GTR + GI                |
| H3       | –                             | GTR + GI                |
| COI      | –                             | GTR + GI                |
| H3_1st   | GTR + Gamma                   | –                       |
| H3_2nd   | GTR + Gamma                   | –                       |
| H3_3rd   | J69 + Homogenous              | –                       |
| COI_1st  | HYK85 + Gamma                 | –                       |
| COI_2nd  | GTR + Gamma                   | –                       |
| COI_3rd  | GTR + Gamma                   | –                       |

#### Mapping of lifestyle and host taxon

To understand how symbiotic association with *Lingula* evolved in Galeommatoidea, we mapped information of the lifestyle

(free-living or symbiotic), habitat and host taxon onto the phylogenetic tree. This information was based on the sampling data in the present and previous studies (Table 1; Sato et al., 2011; Goto et al., 2012). We used the sequence data of *Mysella vitrea* Laserson, 1956, which was analysed by Taylor et al. (2007). The voucher specimen of *M. vitrea* was collected by sieve from the sediment in an intertidal seagrass bed at Myorah, North Stradbroke Island, Moreton Bay, Queensland, eastern Australia, but no host information was available (J.D. Taylor, personal communication). In a previous study this species was found in a free-living state and also in symbiotic association with the ghost shrimp *Trypaea australiensis* Dana, 1852 in eastern Australia (Kerr & Corfield, 1998). Thus, we treated this species as a facultative commensal of *T. australiensis* (Fig. 8B).

## SYSTEMATIC DESCRIPTIONS

### Superfamily Galeommatoidea Gray, 1840

#### Family Montacutidae Clark, 1855

#### Genus *Koreamya* Lützen, Hong & Yamashita, 2009

#### *Koreamya setouchiensis* Goto, Ishikawa & Hamamura, new species

(Figs 2–6)

*Type material:* Holotype (Figs 3, 4, 6): National Museum of Nature and Science, Japan NSMT-Mo 78584. Shell length = 3.5 mm, shell height = 2.7 mm. The specimen was collected from *Lingula anatina* on an intertidal muddy sand flat of Hakatajima Island, Imabari, Ehime, Japan (Figs 1, 2A) on 4 July 2012. Shell length and width of the host *L. anatina* 18.5 mm

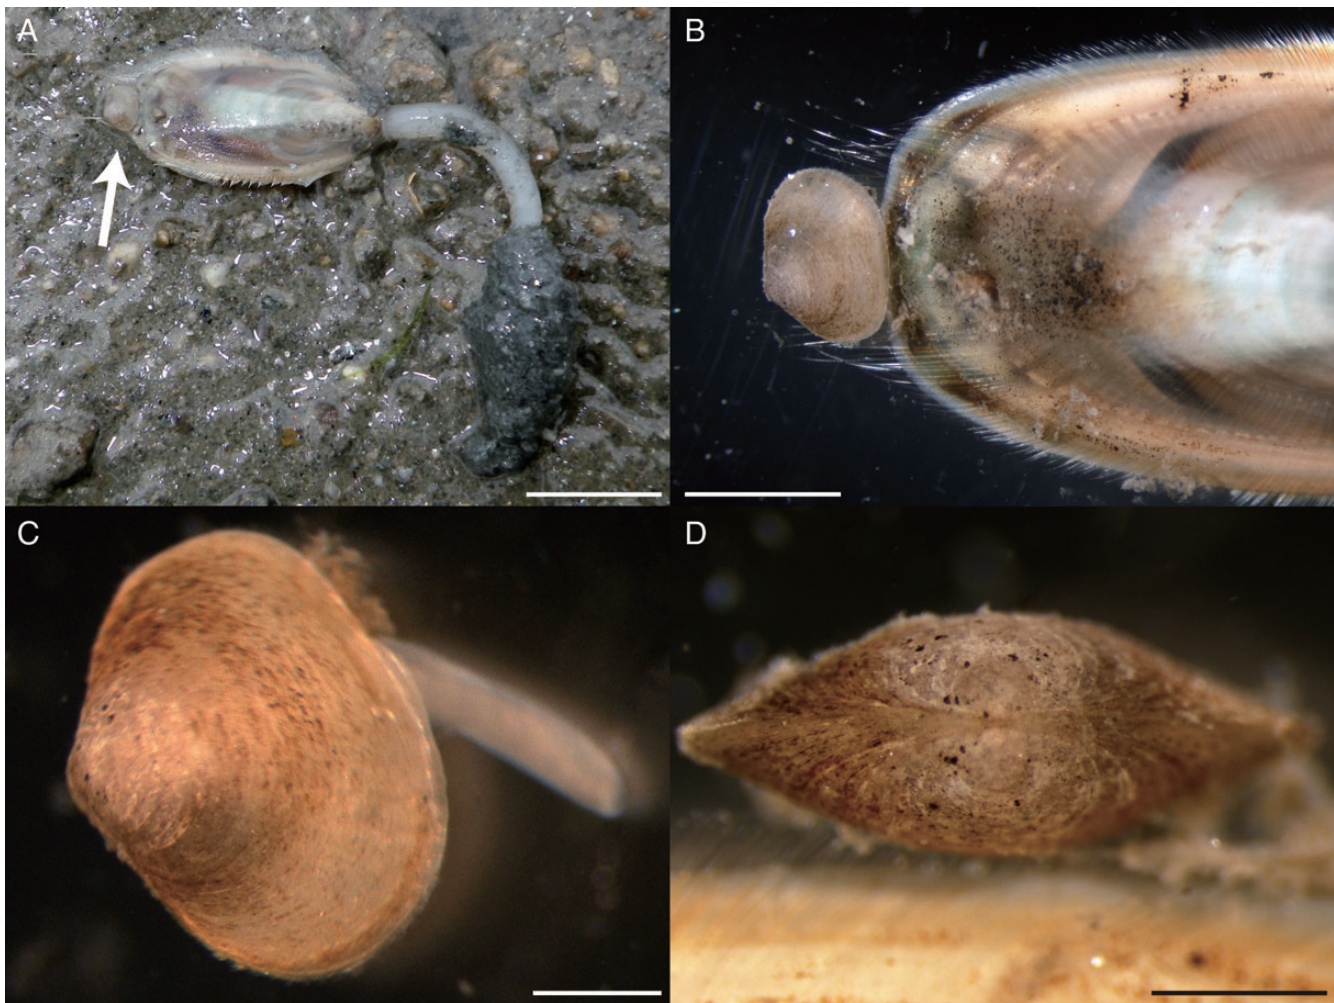

**Figure 3.** *Koreamyia setouchiensis* n. sp. (holotype, NMST-Mo 78584) and its host *Lingula anatina*. **A, B.** *K. setouchiensis* attached to the shell of *L. anatina*. **C.** A creeping *K. setouchiensis* using its muscular foot. **D.** Dorsal view of *K. setouchiensis*. Scale bars: **A** = 1 cm; **B** = 3 mm; **C, D** = 1 mm. (Photographs: R. Goto.)

and 9.5 mm, respectively. Paratype 1 (Fig. 5): NSMT-Mo 78585. Shell length = 2.3 mm, shell height = 1.8 mm. The specimen was collected from *L. anatina* on a subtidal muddy sandy flat (ca. 2 m depth) of Maajiro, Yawatahama, Ehime, Japan (Fig. 1) on 11 September 2011. Soft tissue was used for the molecular phylogenetic analysis (Table 1). The host size was not recorded. Paratype 2: NSMT-Mo 78586. Shell length = 1.7 mm, shell height = 1.5 mm. The specimen was collected from *L. anatina* on an intertidal muddy sand flat of Nigata, Kure, Hiroshima, Japan (Fig. 1) on 26 May 2009. The shell was partly broken when the bivalve was removed from the host. Shell length and width of the host *L. anatina* were 21.0 mm and 9.5 mm, respectively. Paratype 3: NSMT-Mo 78587. Shell length = 2.7 mm, shell height = 2.2 mm. The specimen was collected from *L. anatina* on an intertidal muddy sand flat of Gogoshima Island, Matsuyama, Ehime, Japan (Fig. 1) on 23 May 2012. Soft tissue was used for the molecular phylogenetic analysis (Table 1). Shell length and width of the host *L. anatina* were 15.4 mm and 7.2 mm, respectively.

**Etymology:** The new species is named after the Seto Inland Sea, where the type locality (Hakatajima Island) is situated.

**Shell** (Figs 3–6): Shell small (maximum 3.5 mm), ovate, thin but dorsally inflated, equivalve, inequilateral. Umbo slightly

prominent; beak prosogyrate, located slightly posterior to mid-length of shell; anterior end rounded; posterior end subtruncate; anterodorsal margin nearly straight; posterodorsal margin nearly straight, sometimes slightly incurved posterior to umbo; anterodorsal margin slightly longer than posterodorsal margin; ventral margin rounded. Shell colour brownish white to white. Shell sculpture of many close-set commarginal growth lines and evenly spaced radial ribs; radial ribs indistinct to distinct (Figs 4A, C, 5A, C). Periostracum ornamented with numerous lamellae (Fig. 6). Prodissoconch (Fig. 5G, H): that of holotype heavily corroded; paratype 1 has indistinct prodissoconch I ( $134 \times 104 \mu\text{m}$ ; SL  $\times$  SH) and distinct prodissoconch II ( $410 \times 353 \mu\text{m}$ ; SL  $\times$  SH) with faint growth lines. Hinge (Figs 4E, F, 5E, F) of right shell valve has short but distinct teeth, one anterior and one posterior, diverging approximately  $120^\circ$ ; length of the anterior and posterior tooth nearly equal; resilium on right valve located immediately below umbo and between anterior and posterior tooth, with a rounded to trapezoid lithodesma. Hinge of left valve has elongated but indistinct lamella-like teeth, one anterior and one posterior, diverging approximately  $130^\circ$ ; anterior tooth slightly longer than posterior tooth; resilium on left valve located immediately below umbo, between anterior and posterior tooth, slightly smaller than that on right valve. External ligament absent.

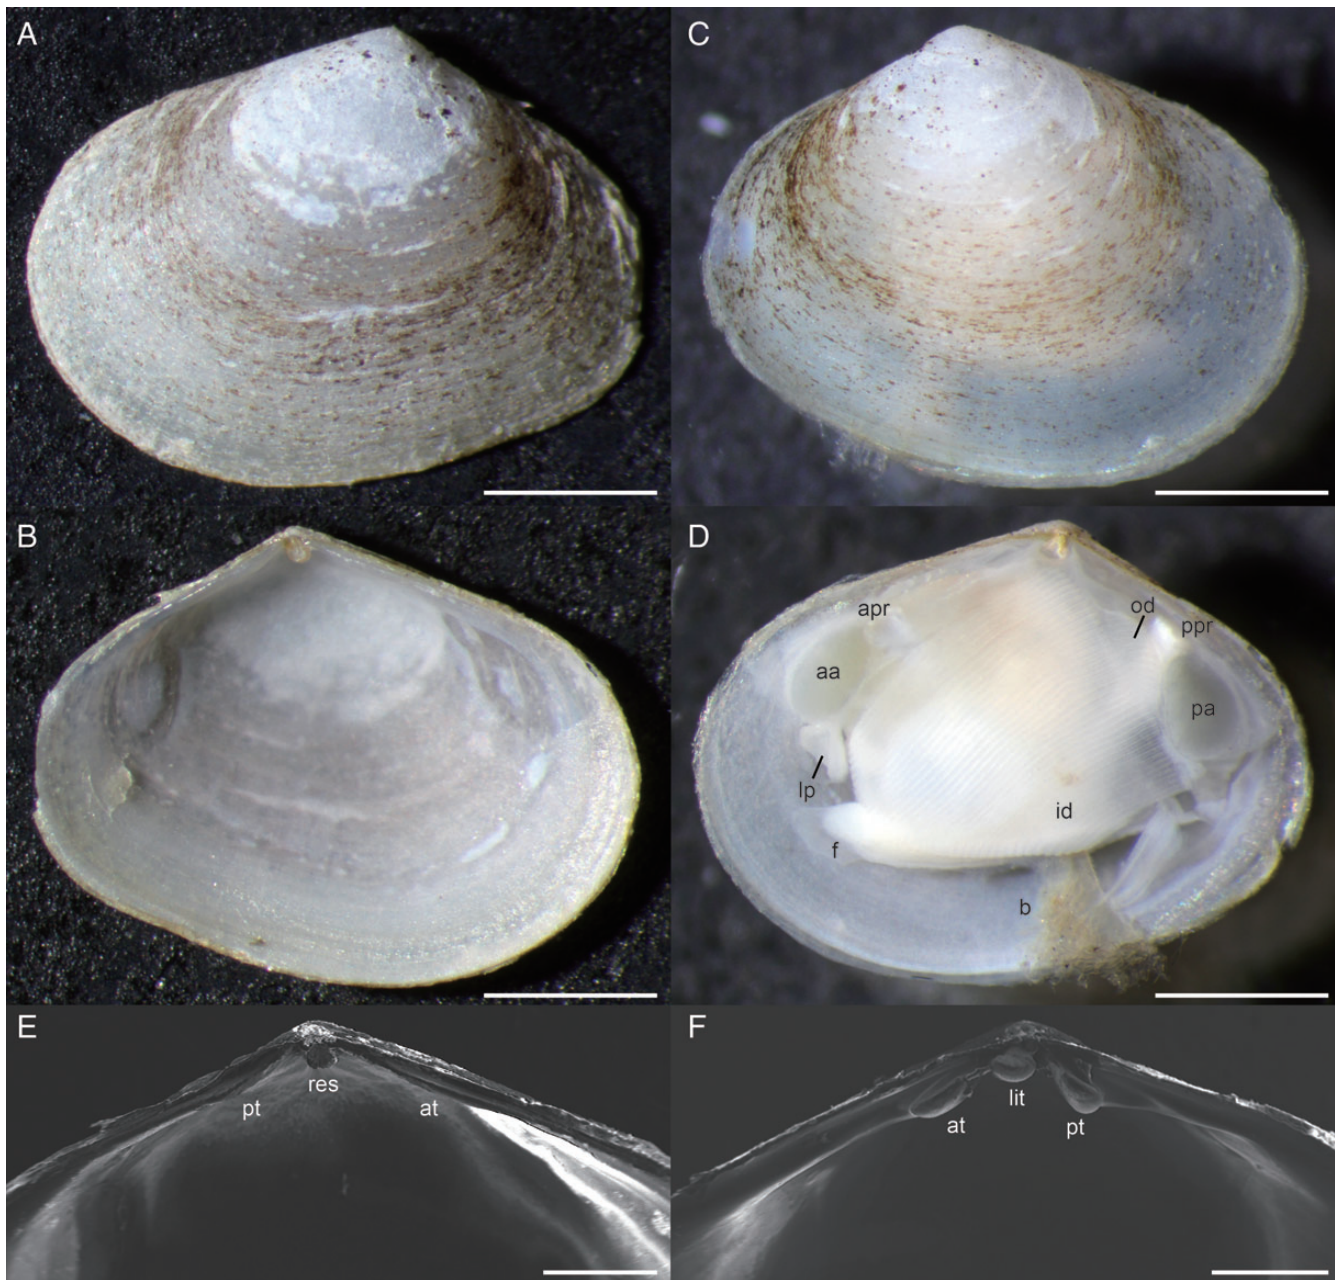

**Figure 4.** *Koreamya setouchiensis* n. sp. (holotype, NMST-Mo 78584). **A, B.** External and internal view of left valve. **C, D.** External and internal view of right valve. **E, F.** Hinge structure of left and right valves. Abbreviations: aa, anterior adductor muscle; apr, adductor pedal retractor muscle; at, anterior tooth; b, byssal threads; f, foot; id, inner demibranch; lp, labial palp; lit, lithodesma; od, outer demibranch; pa, posterior adductor muscle; ppr, posterior pedal retractor muscle; pt, posterior tooth; res, resilium. Scale bars: **A–D** = 1 mm; **E, F** = 400  $\mu$ m; **G** = 100  $\mu$ m. (Photographs: R. Goto.)

*Soft parts* (Fig. 4D): Mantle not reflected, with no tentacles. Both anterior and posterior adductor muscles ovate, subequal and located in relatively dorsal position. Both anterior and posterior pedal retractors dorsal to adductors. Ctenidia: gill axis nearly vertical; flat, consisting of inner and outer demibranch; reduced outer demibranch about one tenth the length of the inner and of only one descending lamella; inner demibranch of both ascending and descending lamellae; ctenidia joined anteriorly to inner and outer labial palps. Labial palps relatively large, leaf-shaped. Foot slender, of moderate size, with a small heel; byssal glands located just in front of heel, with fine, transparent byssal threads.

*Distribution* (Fig. 1): Seto Inland Sea and Uwa Sea, Japan.

*Habitat* (Fig. 2A): Lower intertidal to subtidal zone of muddy sand flats.

*Host association* (Fig. 3A, B): Host *L. anatina* Lamarck, 1801 (Lingulidae, Brachiopoda). The bivalve was attached to the anterior end of the shell valves of *L. anatina* by byssal threads, with its lateral side nearly horizontal to the host shell surface (Fig. 3A, B). Of the four specimens observed, two were attached to the ventral valve of *Lingula*; however, no data were recorded regarding

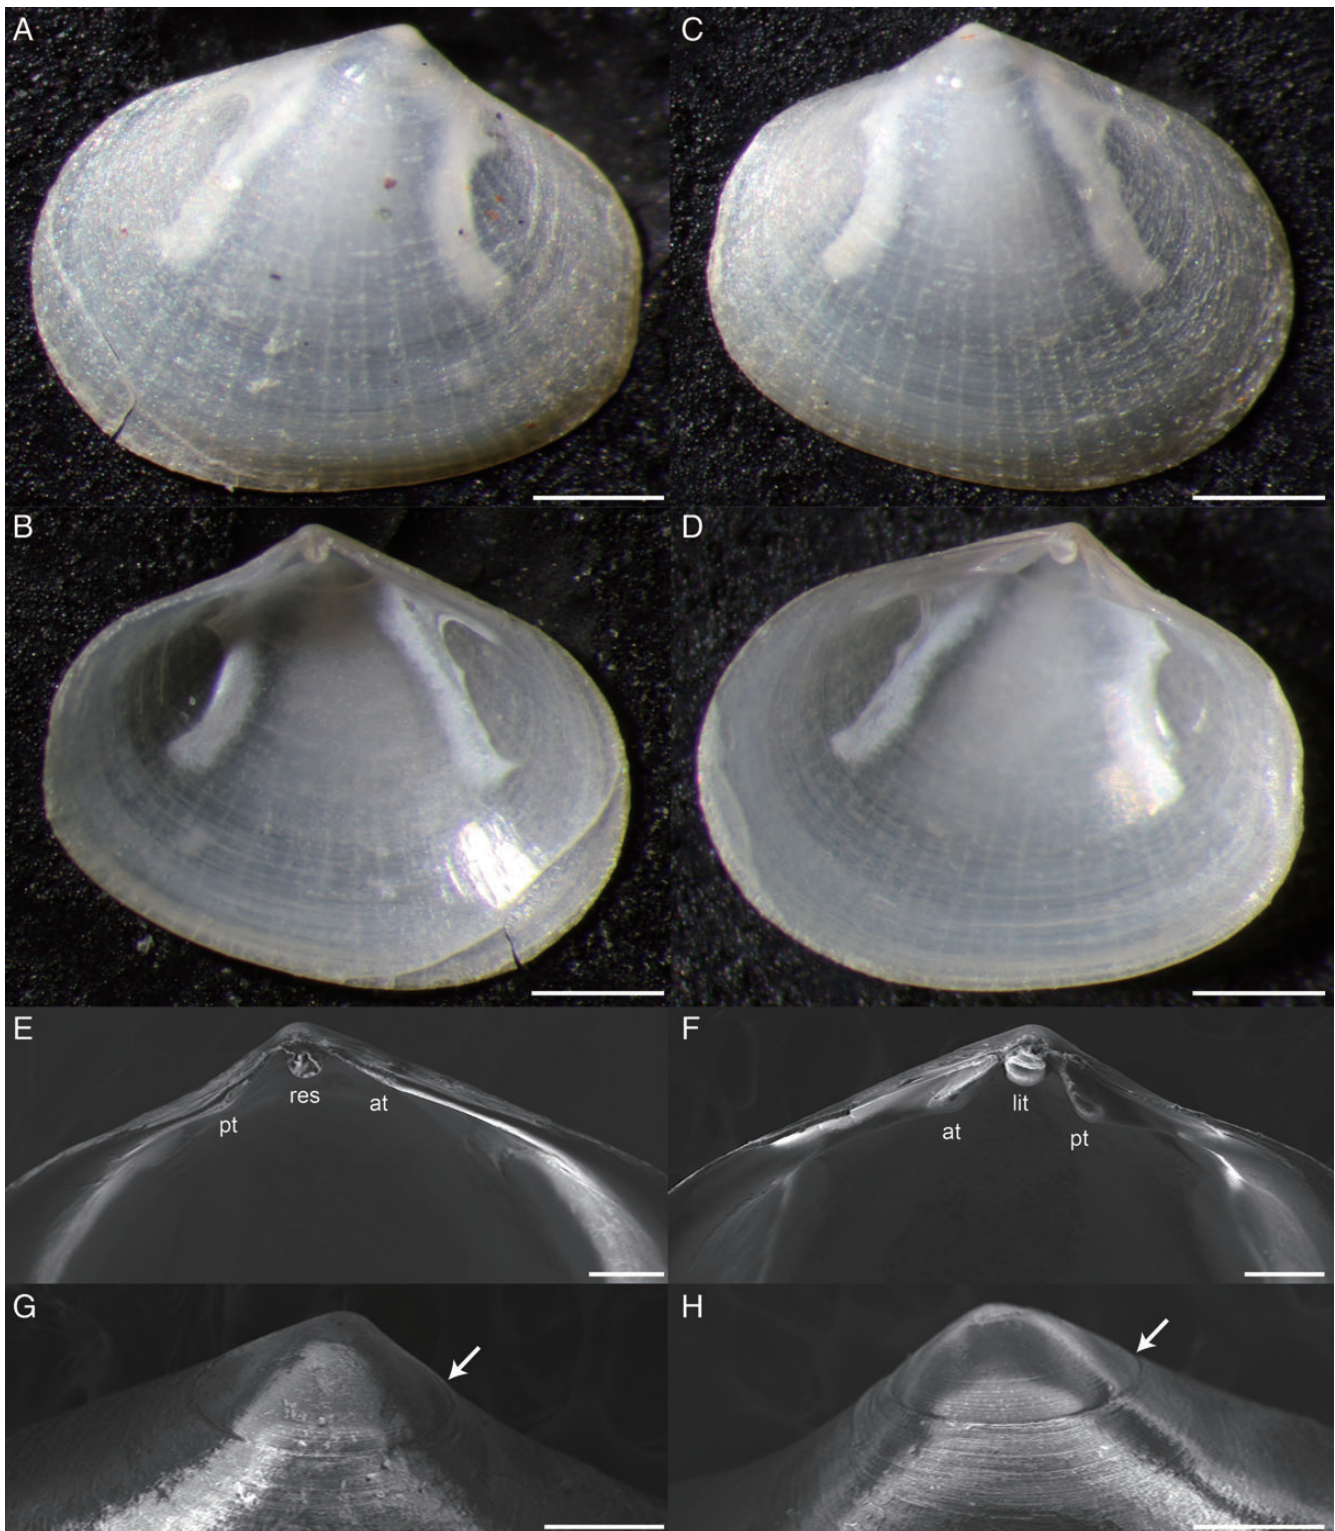

**Figure 5.** *Koreamya setouchiensis* n. sp. (paratype 1, NMST-Mo 74585). **A, B.** External and internal view of left valve. **C, D.** External and internal view of right valve. **E, F.** Hinge structure of left and right valves. **G, H.** Prodissoconch of left and right valve. White arrows indicate prodissoconch II. Abbreviations: at, anterior tooth; pt, posterior tooth; lit, lithodesma; res, resilium. Scale bars: **A–D** = 0.5 mm; **B–H** = 200  $\mu$ m. (Photographs: R. Goto.)

whether the other two specimens were attached to the ventral or dorsal valve. The number of bivalves per host was always one ( $N = 4$ ). Once the bivalves were removed from their hosts in the aquaria, they actively moved using their foot (Fig. 3C).

*Remarks:* The new species shares several morphological and anatomical characteristics with *K. arcuata*, such as a hinge structure, the presence of a lithodesma, the shell surface ornamented with numerous lamellae, evenly spaced radial ribs and a highly



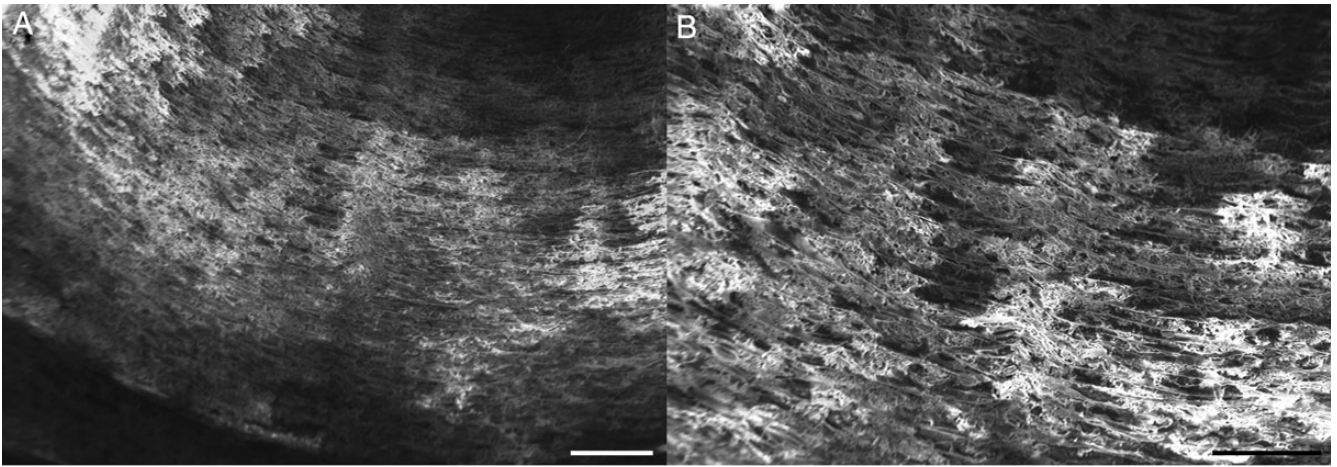

**Figure 6.** SEM images of the shell of *Koreamya setouchiensis* n. sp. (holotype, NMST-Mo 78584). **A, B.** Periostracum ornamented by numerous lamellae. Scale bars = 100  $\mu$ m. (Photographs: R. Goto.)

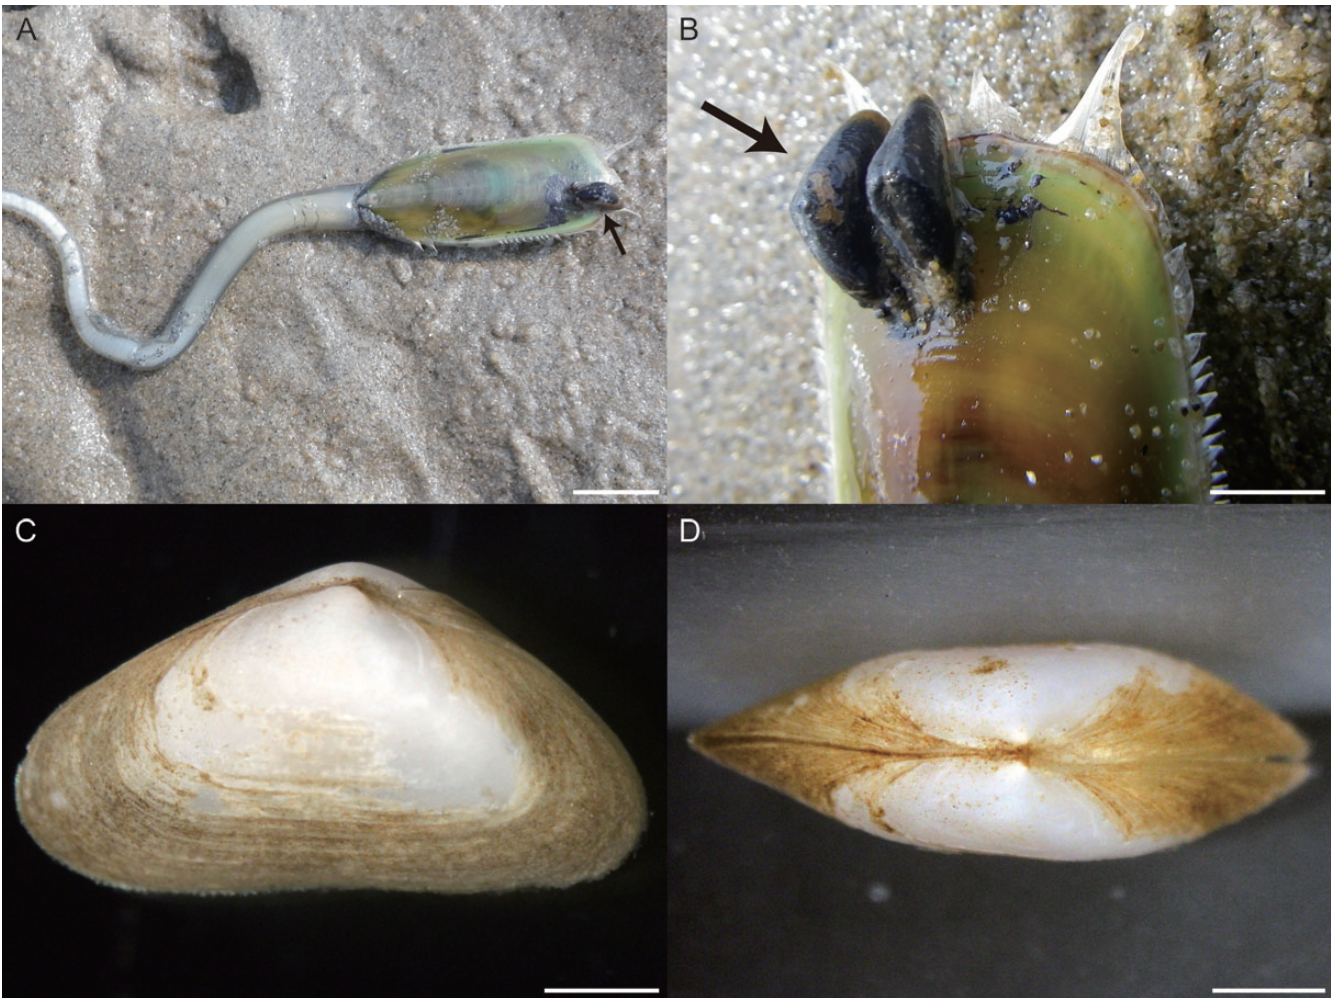

**Figure 7.** *Koreamya arcuata* and its host *Lingula anatina*, from Seondo-ri, Biin-myeon, Seocheon-gun, Chungcheongnam-do, South Korea. **A, B.** *K. arcuata* attached to shell of *L. anatina*. **C.** Lateral view of *K. arcuata*. **D.** Dorsal view of *K. arcuata*. Scar bars: **A** = 1 cm; **B** = 3 mm; **C, D** = 1 mm. (Photographs: **A, B,** S. Sato; **C, D,** R. Goto.)

reduced outer demibranch (Figs 3–6; Lützen, Hong & Yamashita, 2009; Sato *et al.*, 2011). In addition, both bivalves are ecologically very similar in having a symbiotic association

with *Lingula* (Figs 3, 7). Thus, we place the new species in the genus *Koreamya*, which consequently includes two species, *K. setouchiensis* and *K. arcuata*. These two species are clearly

A

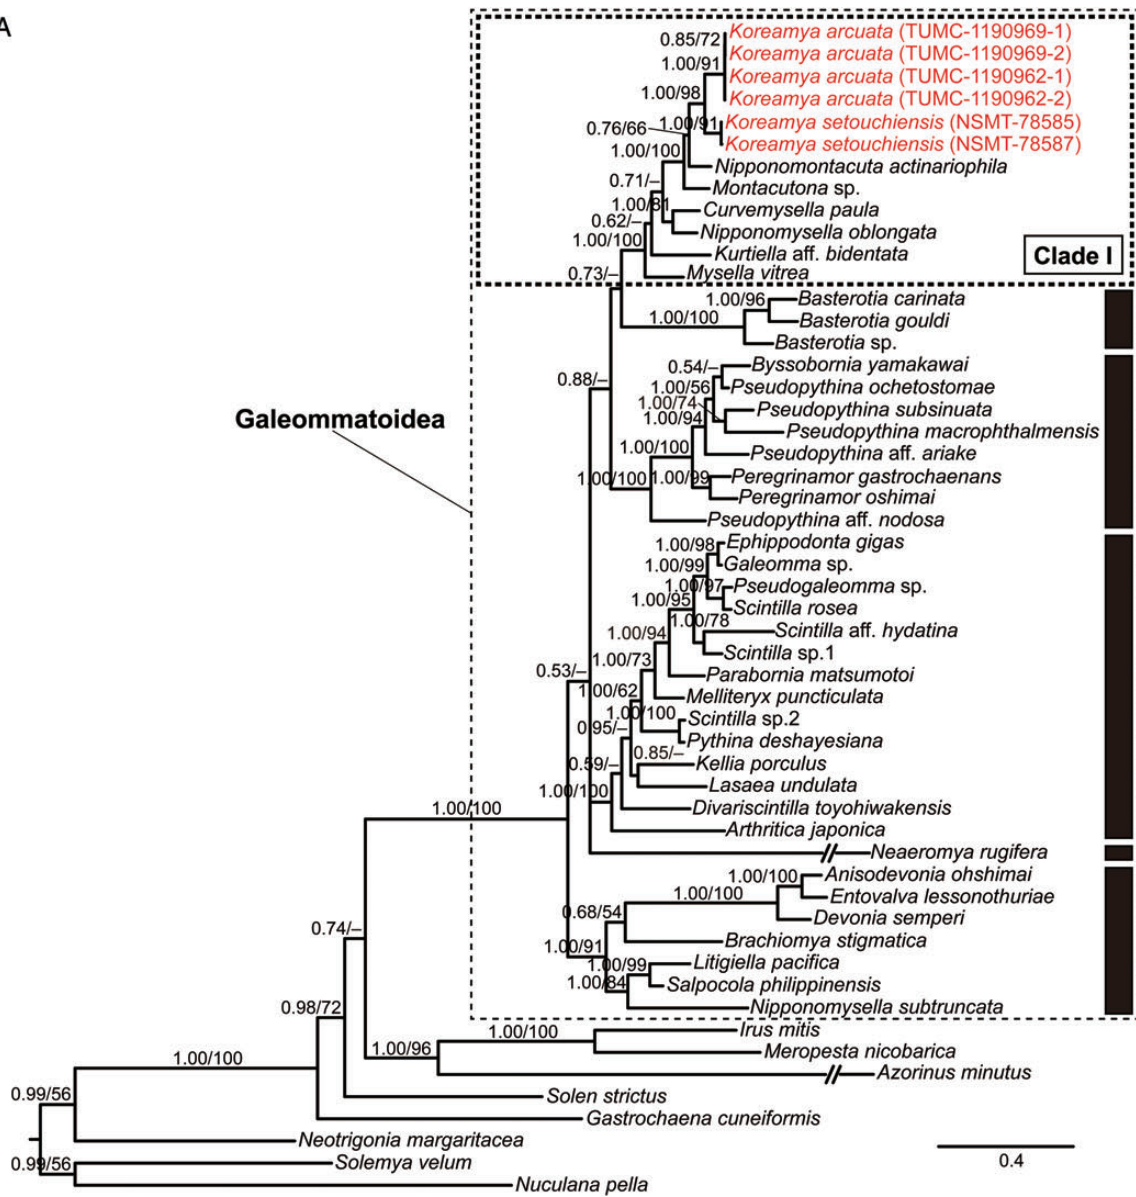

B

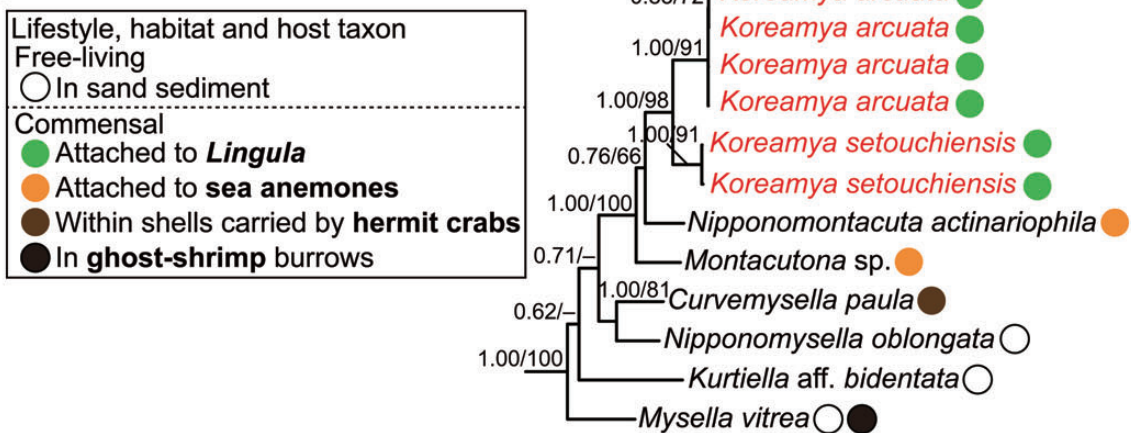

**Figure 8.** Bayesian tree of Galeommatoidea, including *Koreameya setouchiensis* n. sp. and *K. arcuata*, based on the combined dataset of 18S, 28S, H3 and COI genes. Numbers above branches indicate Bayesian posterior probabilities followed by maximum likelihood bootstrap support values. **A.** Entire tree. Vertical black bars indicate the five major clades except Clade I. **B.** Partial tree showing Clade I, with symbols indicating lifestyle, habitat and host taxon. The samples of which sequences were newly obtained in this study, are shown in red. The information on the lifestyle, habitat and host taxon is based on the data of the present and previous studies (Kerr & Corfield, 1998; Taylor et al., 2007; Sato et al., 2011; Goto et al., 2012; J.D. Taylor, personal communication).

distinguished by several shell characteristics. The shell outline of *K. setouchiensis* is ovate (Figs 3–5), while that of *K. arcuata* is elongated and triangular (Fig. 7). The ventral margin of the former is rounded (Figs 3–5), while that of the latter is straight or slightly incurved (Fig. 7C; Savazzi, 2001; Lützen, Hong & Yamashita, 2009; Sato et al., 2011). *Koreamya setouchiensis* is smaller and thinner than *K. arcuata*. The shell length of *K. setouchiensis* is up to 3.5 mm (holotype), but that of *K. arcuata* often exceeds 7.0 mm (Lützen, Hong & Yamashita, 2009; Sato et al., 2011).

Radial ribs are indistinct in the holotype, but distinct in paratype 1 (Figs 4, 5). In addition, the shell outline is slightly different between holotype and paratype 1 (Figs 4, 5). Similar intraspecific morphological variation was also reported in *K. arcuata* (Sato et al., 2011). The shell length of the holotype is about 1.5 times larger than that of paratype 1, perhaps due to a difference in the developmental stage.

## PHYLOGENETIC ANALYSIS

The Bayesian and ML analyses based on the combined dataset (18S + 28S + H3 + COI) recovered six major clades in Galeommatoidea (Fig. 8A), in accordance with Goto et al. (2012). *Koreamya arcuata* and *K. setouchiensis* were grouped into one of the major clades (Clade I in Fig. 8A) and each recovered as monophyletic [*K. arcuata*: Bayesian posterior probability (BPP) = 1.00, ML bootstrap percentage (MBP) = 91; *K. setouchiensis*: BPP = 1.00, MBP = 91] (Fig. 8). A sister-group relationship between *K. arcuata* and *K. setouchiensis* was highly supported (BPP = 1.00, MBP = 98; Fig. 8). The *Koreamya* clade formed a monophyletic group with the anemone-associated galeommatoideans (*Montacutona* sp. and *Nipponomontacuta actinariophila* Yamamoto & Habe 1961) (BPP = 1.00, MBP = 100; Fig. 8B). Within this group, the sister-group relationship of *Koreamya* and *N. actinariophila* was weakly supported (BPP = 0.76, MBP = 66; Fig. 8B). On the other hand, *K. arcuata* and *Curvemysella paula* were separated into different clades (Fig. 8B), although these two have previously been considered conspecific (Morton & Scott, 1989).

## DISCUSSION

### *Evolution of symbiotic association with Lingula*

Our phylogenetic analyses indicate that the symbiotic associations with *Lingula* in *Koreamya arcuata* and *K. setouchiensis* have a single evolutionary origin (Fig. 8). Furthermore, the *Koreamya* clade formed a monophyletic group with the anemone-associated galeommatoideans (*Montacutona* sp. and *Nipponomontacuta actinariophila*) (Fig. 8B), suggesting that that host switching may have occurred between sea anemones and *Lingula*. Species of *Koreamya*, *Montacutona* and *Nipponomontacuta* share several morphological characteristics (e.g. hinge teeth structure, the presence of a lithodesma and a reduced outer demibranch) (this study; Yamamoto & Habe, 1961; Morton, 1980; Lützen, Hong & Yamashita, 2009; R. Goto, unpublished). In addition, they are attached to the host body directly by byssal threads (this study; Yamamoto & Habe, 1961; Morton, 1980; Savazzi, 2001; Lützen, Hong & Yamashita, 2009; Goto et al., 2012). These morphological and ecological similarities also support the possibility of host switching between sea anemones and *Lingula*. According to the topology (Fig. 8B), host switching appears to have occurred from sea anemones to *Lingula*. However, since the support for the clade of *Koreamya* and *Nipponomontacuta* is low (Fig. 8B), additional genetic data and taxon sampling are needed to confirm the direction of host switching.

### *Taxonomic implications*

We tentatively assigned the new species *K. setouchiensis* to the family Montacutidae, referring to the classification by Lützen, Hong & Yamashita (2009). However, it is widely recognized that the family-level classification of Galeommatoidea is confused and requires revision (Ponder, 1998; Bieler, Carter & Coan, 2010). In fact, a recent molecular phylogeny suggested that Montacutidae are polyphyletic (Goto et al., 2012).

The close relationship between *Montacutona* and *K. arcuata* was first suggested based on several morphological characteristics (e.g. the presence of a lithodesma, a reduced outer demibranch and a particular type of sperm receptacle) (Lützen, Hong & Yamashita, 2009). However, they are distinguished by their shell morphology; the shell of *Montacutona* is rounded to ovate (Morton, 1980), while that of *K. arcuata* is elongated and triangular with a slightly incurved ventral margin (Lützen, Hong & Yamashita, 2009; Fig. 7). Based on this morphological difference, the genus *Koreamya* was recently established (Lützen, Hong & Yamashita, 2009). Nevertheless, the new species *K. setouchiensis* has an ovate shell (Figs 3–5), which is relatively similar to that of *Montacutona*. Thus, the inclusion of this species in *Koreamya* suggests that the morphological definition of this genus should be revised (i.e. shell is ovate or elongated and triangular).

The genus *Nipponomontacuta* includes the only one species, *N. actinariophila*. This species formed a sister-group relationship with *Koreamya* in the phylogenetic tree although the support for this relationship was low (Fig. 8). *Nipponomontacuta actinariophila* has an ovate shell with hinge teeth similar to those of *Montacutona* and *Koreamya* (R. Goto, unpublished). In addition, this species has a lithodesma and a highly reduced demibranch like *Koreamya* and *Montacutona* (R. Goto, unpublished). However, this species has orange to reddish shells, which are clearly different from those of *Montacutona* and *Koreamya*.

*Koreamya arcuata* has been considered identical to *C. paula*, because both have anteroposteriorly elongated, dorsoventrally compressed shells with slightly incurved ventral margins (Morton & Scott, 1989). Our molecular phylogeny clearly shows that *C. paula* and *K. arcuata* are separated into different clades, suggesting that unusually elongated shells have evolved at least twice in Clade I (Fig. 8). The shell shape of *C. paula* is suggested to be a morphological adaptation to symbiotic life in the empty snail shells occupied by hermit crabs (Goto et al., 2007). Thus, the apparently similar shaped shells of *K. arcuata* and *C. paula* are probably the consequence of convergent adaptation to symbiotic life on convex substrata.

### *Host associations*

*Koreamya setouchiensis* always attaches to the anterior end of *Lingula* shells (Fig. 3A, B), probably to utilize the water currents created by the host for filter feeding. *Lingula anatina* has three holes on the anterior end of the mantle for filter feeding, one central exhalant hole and two inhalant holes on either side of the central hole. Since the holotype of *K. setouchiensis* was attached to the central part of the anterior end of the host (Fig. 3A, B), this bivalve species may prefer to use the exhalant current created by the host, although further observation is needed to confirm this. It may also feed on mucus secreted by the host. Savazzi (2001) suggested that *K. arcuata* collects food particles from the mantle of the host *Lingula* using the adhesive foot. However, such behaviour was not observed in *K. setouchiensis* in this study. Considering that *K. setouchiensis* is a filter feeder and does not damage the host by feeding, the association between *K. setouchiensis* and its host is probably commensalism, as was suggested to be the case in *K. arcuata* (Savazzi, 2001; Lützen, Hong & Yamashita, 2009).

*Differential adaptation to symbiotic life with Lingula*

The genus *Koreamyra* comprises two species, *K. setouchiensis* and *K. arcuata*. These are clearly different in shell appearance; *K. setouchiensis* has a laterally flattened, ovate shell (Figs 3–5), while *K. arcuata* has a dorsoventrally compressed, anteroposteriorly elongated-triangular shell (Fig. 7C, D; Lützen, Hong & Yamashita, 2009; Sato *et al.*, 2011). These morphological differences likely correspond to the difference in posture on the hosts; *K. setouchiensis* is attached to the host with its lateral side parallel to the host shell surface (Fig. 3A, B), whereas *K. arcuata* is attached to the host with its lateral side nearly perpendicular to the host shell surface (Fig. 7B, C; Lützen, Hong & Yamashita, 2009; Sato *et al.*, 2011). The morphology and posture of *K. setouchiensis* are thought to be adaptive because they reduce friction when *Lingula* shells withdraw into their burrows, which they do frequently. In contrast, the posture of *K. arcuata* in the narrow interspace between the host shell and burrow wall results in morphological constraint as the bivalves cannot grow dorsoventrally, but only laterally and anteroposteriorly. Thus, the morphological differences of *K. setouchiensis* and *K. arcuata* are probably consequences of differential specializations to symbiotic life with *Lingula*.

*Distribution and host*

*Koreamyra arcuata* has a wide distribution from South Korea to the Philippines, India and Australia (Fernando & Fernando, 1983; Savazzi, 1991, 2001; Hong, Yamashita & Sato, 2007; Lützen, Hong & Yamashita, 2009; Sato *et al.*, 2011). In contrast, *K. setouchiensis* is only known in and around the Seto Inland Sea, Japan (Fig. 1a–d), although it is possible that it has a wider geographic distribution. The hosts of *K. arcuata* include *L. anatina*, *L. adamsi* and *L. translucida* Dall, 1920 (Fernando & Fernando, 1983; Savazzi, 1991, 2001; Lützen, Hong & Yamashita, 2009; Sato *et al.*, 2011), while we identified the host of *K. setouchiensis* as *L. anatina*. However, the shell appearance of *L. anatina* in South Korea (the host of *K. arcuata*) and that of *L. anatina* in the Seto Inland Sea (the host of *K. setouchiensis*) differ slightly; the latter has smaller, thinner and more yellowish shells than the former and, in addition, the shell width of the former is constant toward the anterior end, while that of the latter becomes narrower towards the anterior end (Figs 3A, B, 7A, B). A previous study suggested that *L. anatina* from around Japan is genetically separated into several groups, which could be separate species (Endo, Ozawa & Kojima, 2001). Thus, further morphological and molecular assessments on *L. anatina* are required to identify precisely the hosts of *K. setouchiensis* and *K. arcuata*.

## ACKNOWLEDGEMENTS

We thank M. Owada for providing the DNA samples of *Koreamyra arcuata*; J. D. Taylor for providing the sampling information of *Mysella vitrea*; T. Haga and H. Yamashita for discussion; and Y. Kano and H. Fukumori for the preparation of the figures. This work was funded by a Japan Society for the Promotion of Science (JSPS) Grant to MK and a JSPS Research Fellowships for Young Scientists Grant to RG.

## REFERENCES

BIELER, R., CARTER, G.J. & COAN, E.V. 2010. Classification of bivalve families. *Malacologia*, **52**: 113–184.  
BOSS, K.J. 1965. Symbiotic erycinacean bivalves. *Malacologia*, **3**: 183–195.  
BOUCHET, P., LOZOUET, P., MAESTRATI, P. & HÉROS, V. 2002. Assessing the magnitude of species richness in tropical marine

environments: exceptionally high numbers of molluscs at a New Caledonia site. *Biological Journal of Linnean Society*, **75**: 421–436.  
CASTRESANA, J. 2000. Selection of conserved blocks from multiple alignments for their use in phylogenetic analysis. *Molecular Biology and Evolution*, **17**: 540–552.  
COAN, E.V. & VALENTICH SCOTT, P. 2012. *Bivalve seashells of tropical West America—marine bivalve mollusks from Baja California to northern Perú*. Santa Barbara Museum of Natural History Press, Santa Barbara.  
COAN, E.V., VALENTICH SCOTT, P. & BERNARD, F.R. 2000. *Bivalve seashells of western North America*. Santa Barbara Museum of Natural History Press, Santa Barbara.  
COLGAN, D.J., McLAUCHLAN, A., WILSON, G.D.F., LIVINGSTON, S., MACARANAS, J., EDGEcombe, G.D., CASSIS, G. & GRAY, M.R. 1998. Molecular phylogenetics of the Arthropoda: relationships based on histone H3 and U2 snRNA DNA sequences. *Australian Journal of Zoology*, **46**: 419–437.  
COLGAN, D.J., PONDER, W.F., BEACHAM, E. & MACARANAS, J.M. 2003. Gastropod phylogeny based on six segments from four genes representing coding or non-coding and mitochondrial or nuclear DNA. *Molluscan Research*, **23**: 123–148.  
DAYRAT, B., TILLIER, A., LECOINTRE, G. & TILLIER, S. 2001. New clades of euthyneuran gastropods (Mollusca) from 28S rRNA sequences. *Molecular Phylogenetics and Evolution*, **19**: 225–235.  
EDGAR, R.C. 2004. Muscle: multiple sequence alignment with high accuracy and high throughput. *Nucleic Acids Research*, **32**: 1792–1797.  
EMIG, C.C. 2000. Ecology of inarticulated brachiopods. In: *Treatise on invertebrate paleontology. Part H. Revised. Brachiopoda*, Vol. 1. (R.L. Kaesler, ed.), pp. 2580–2590. Geological Society of America and University of Kansas, Boulder and Lawrence.  
ENDO, K., OZAWA, I. & KOJIMA, S. 2001. Nuclear and mitochondrial gene sequences reveal unexpected genetic heterogeneity among northern Pacific populations of the brachiopod *Lingula anatina*. *Marine Biology*, **139**: 105–112.  
FERNANDO, S.A. & FERNANDO, O.J. 1983. Association of *Pythina arcuata*, Adams 1856, an erycinid bivalve with *Lingula translucida* Dall, 1921, from Indian waters. *Current Science*, **52**: 940.  
FOLMER, O., BLACK, M., HOEH, W., LUTZ, R.A. & VRIJENHOEK, R. 1994. DNA primers for amplification of mitochondrial cytochrome *c* oxidase subunit I from diverse metazoan invertebrates. *Molecular Marine Biology and Biotechnology*, **3**: 294–299.  
GALTIER, N., GOUY, M. & GAUTIER, C. 1996. SEAVIEW and PHYLOWIN: two graphic tools for sequence alignment and molecular phylogeny. *Computer Applications in Biosciences*, **12**: 543–548.  
GOTO, R., HAMAMURA, Y. & KATO, M. 2007. Obligate commensalism of *Curvemysella paula* (Bivalvia: Galeommatidae) with hermit crabs. *Marine Biology*, **151**: 1615–1622.  
GOTO, R., KAWAKITA, A., ISHIKAWA, H., HAMAMURA, Y. & KATO, M. 2012. Molecular phylogeny of the bivalve superfamily Galeommatoidae reveals dynamic evolution of symbiotic lifestyle and interphyllum host switching. *BMC Evolutionary Biology*, **12**: 172.  
GOUY, M., GUINDON, S. & GASCUEL, O. 2010. Seaview version 4: a multiplatform graphical user interface for sequence alignment and phylogenetic tree building. *Molecular Biology and Evolution*, **27**: 221–224.  
HAMMOND, L.S. 1984. Epibiota from the valves of Recent *Lingula* (Brachiopoda). *Journal of Paleontology*, **58**: 1528–1531.  
HILLIS, D.M. & DIXON, M.T. 1991. Ribosomal DNA: Molecular evolution and phylogenetic inference. *Quarterly Review of Biology*, **66**: 411–453.  
HONG, J.-S., YAMASHITA, H. & SATO, S. 2007. The Saemangeum Reclamation project in South Korea threatens to extinguish a unique mollusk, ectosymbiotic bivalve species attached to the shell of *Lingula anatina*. *Plankton and Benthos Research*, **2**: 70–75.  
HOSO, M., KAMEDA, Y., WU, S.P., ASAMI, T., KATO, M. & HORI, M. 2010. A speciation gene for left-right reversal in snails results in anti-predator adaptation. *Nature Communications*, **1**: 133.  
JOB, G. 2007. TREEFINDER available from Munich. <[www.treefinder.de](http://www.treefinder.de)>.

- JOB, G., HAESELER, A. & STRIMMER, K. 2004. TREEFINDER: a powerful graphical analysis environment for molecular phylogenetics. *BMC Evolutionary Biology*, **4**: 18.
- KERR, G. & CORFIELD, J. 1998. Association between the ghost shrimp *Trypaea australiensis* Dana 1852 (Crustacea: Decapoda) and a small deposit-feeding bivalve *Mysella vitrea* Laseron 1956 (Mollusca: Leptonidae). *Marine and Freshwater Research*, **49**: 801–806.
- LI, J. & Ó FOIGHIL, D. 2012. Host-specific morphologies but no host races in the commensal bivalve *Neaeromya rugifera*. *Invertebrate Biology*, **3**: 197–203.
- LÜTZEN, J., HONG, J.-S. & YAMASHITA, H. 2009. *Koreomya arcuata* (A. Adams, 1856) gen. nov. (Galeommatoidea; Montacutidae), a commensal bivalve associated with the inarticulate brachiopod *Lingula anatina*. *Journal of Conchology*, **39**: 669–679.
- MORTON, B. 1980. Some aspects of the biology and functional morphology (including the presence of a ligament) of *Montacutona compacta* and *M. olivacea* (Bivalvia: Leptonacea) associated with coelenterates in Hong Kong. *Journal of Zoology, London*, **192**: 431–455.
- MORTON, B. 1988. *Partnerships in the sea: Hong Kong's marine symbioses*. Hong Kong University Press, Hong Kong.
- MORTON, B. & SCOTT, P.H. 1989. The Hong Kong Galeommatacea (Mollusca: Bivalvia) and their hosts, with descriptions of new species. *Asian Marine Biology*, **6**: 129–160.
- OCKELMANN, K.W. & MUUS, K. 1978. The biology, ecology and behaviour of the bivalve *Mysella bidentata* (Montagu). *Ophelia*, **17**: 1–93.
- PAULAY, G. 2003. Marine Bivalvia (Mollusca) of Guam. *Micronesica*, **35–36**: 218–243.
- PONDER, W.F. 1998. Superfamily Galeommatoidea. In: *Mollusca. The southern synthesis. Fauna of Australia*. Vol. 5, Part B. (P.L. Beesley, G.J.B. Ross & A. Wells, eds), pp. 316–318. CSIRO Publishing, Melbourne.
- RONQUIST, F. & HUELSENBECK, J.P. 2003. MRBAYES 3: Bayesian phylogenetic inference under mixed models. *Bioinformatics*, **19**: 1572–1574.
- SATO, S., OWADA, M., HAGA, T., HONG, J.-S., LÜTZEN, J. & YAMASHITA, H. 2011. Genus-specific commensalism of the galeommatooid bivalve *Koreomya arcuata* (A. Adams, 1856) associated with lingulid brachiopods. *Molluscan Research*, **31**: 95–105.
- SAUNDERS, G.W. & KRAFT, G.T. 1994. Small-subunit rRNA gene sequences from representatives of selected families of the Gigartinales and Rhodymeniales (Rhodophyta). 1. Evidence for the Plocamiales ord. nov. *Canadian Journal of Botany*, **72**: 1250–1263.
- SAVAZZI, E. 1991. Burrowing in the inarticulate brachiopod *Lingula anatina*. *Palaeogeography, Palaeoclimatology, Palaeoecology*, **85**: 101–106.
- SAVAZZI, E. 2001. A review of symbiosis in the Bivalvia, with special attention to macrosymbiosis. *Paleontological Research*, **5**: 55–73.
- TALAVERA, G. & CASTRESANA, J. 2007. Improvement of phylogenies after removing divergent and ambiguously aligned blocks from protein sequence alignments. *Systematic Biology*, **56**: 564–577.
- TANABE, A.S. 2011. Kakusan4 and Aminosan: two programs for comparing nonpartitioned, proportional and separate models for combined molecular phylogenetic analyses of multilocus sequence data. *Molecular Ecology Resources*, **11**: 914–921.
- TAYLOR, J.D., WILLIAMS, S.T., GLOVER, E.A. & DYAL, P. 2007. A molecular phylogeny of heterodont bivalves (Mollusca: Bivalvia: Heterodonta): new analyses of 18S and 28S rRNA genes. *Zoologica Scripta*, **36**: 587–606.
- VONNEMANN, V., SCHRÖDL, M., KLUSSMANN-KOLB, A. & WÄGELE, H. 2005. Reconstruction of the phylogeny of the Opisthobranchia (Mollusca: Gastropoda) by means of 18S and 28S rRNA gene sequences. *Journal of Molluscan Studies*, **71**: 113–125.
- WOLLSCHIED, E. & WÄGELE, H. 1999. Initial results on the molecular phylogeny of the Nudibranchia (Gastropoda, Opisthobranchia) based on 18S rDNA data. *Molecular Phylogenetics and Evolution*, **13**: 215–226.
- YAMAMOTO, T. & HABE, T. 1961. *Nipponomontacuta actinariophila* gen. et sp. nov., a new commensal bivalve of the sea anemone. *Publications of the Seto Marine Biological Laboratory*, **9**: 265–266.
